# Supplementary material for: Effects of anesthetics pentobarbital sodium and chloral hydrate on urine proteome
Source: PeerJ. 2015 Mar 12;3:e813. doi: 10.7717/peerj.813 (PMC4362303; doi:10.7717/peerj.813)
Supplement: Table S2 — (A) Label-free quantitation data of proteins identified in pentobarbital sodium group. (B) Label-free quantitation data of proteins identified in chloral hydrate group. [file peerj-03-813-s002.xlsx]

## Sheet: pentobarbital sodium group
"B"means normal urine while "A" means urine with anesthesia
				Normalized abundance
Accession	Peptide count	Confidence score	Description	B1	B2	B3	A1	A2	A3
1433Z_RAT	2	78.61	14-3-3 protein zeta/delta OS=Rattus norvegicus GN=Ywhaz PE=1 SV=1	63693.2	237190	780326	264637	329279	72382.1
22P1_RAT	10	1163.88	Cystatin-related protein 1 OS=Rattus norvegicus GN=Andpro PE=1 SV=1	2.6601e+08	1.10661e+08	7.99376e+07	6.94987e+07	3.39834e+08	1.01703e+06
22P2_RAT	7	720.41	Cystatin-related protein 2 OS=Rattus norvegicus GN=Crp2 PE=2 SV=1	1.39811e+08	2.75762e+07	1.56853e+07	3.6239e+07	1.93062e+08	279598
6PGL_RAT	7	762.26	6-phosphogluconolactonase OS=Rattus norvegicus GN=Pgls PE=1 SV=1	8.80949e+06	1.29399e+07	1.26541e+07	1.58087e+07	1.06722e+07	1.16797e+07
A1AG_RAT	2	310.52	Alpha-1-acid glycoprotein OS=Rattus norvegicus GN=Orm1 PE=2 SV=1	1.58527e+06	2.15316e+06	2.6619e+06	2.80882e+06	1.58428e+06	3.26091e+06
A1AT_RAT	13	1877.95	Alpha-1-antiproteinase OS=Rattus norvegicus GN=Serpina1 PE=1 SV=2	1.87908e+07	2.28764e+07	2.3571e+07	1.14624e+08	1.28108e+08	1.99905e+08
A1I3_RAT	17	1592.43	Alpha-1-inhibitor 3 OS=Rattus norvegicus GN=A1i3 PE=1 SV=1	4.23838e+06	3.76133e+06	1.09173e+07	1.06421e+07	5.25511e+06	4.185e+07
A1M_RAT	22	2518.84	Alpha-1-macroglobulin OS=Rattus norvegicus GN=A1m PE=1 SV=1	5.42263e+07	5.11083e+07	1.04902e+08	2.31434e+07	2.69474e+07	3.85891e+07
ABHEB_RAT	4	242.67	Alpha/beta hydrolase domain-containing protein 14B OS=Rattus norvegicus GN=Abhd14b PE=2 SV=1	1.01549e+06	2.28874e+06	3.49111e+06	1.55569e+06	584013	799299
ACTB_RAT;ACTG_RAT	6	588.78	Actin, cytoplasmic 1 OS=Rattus norvegicus GN=Actb PE=1 SV=1	4.93439e+06	4.53611e+06	2.90411e+07	7.05779e+06	2.12935e+06	6.49195e+06
AFAM_RAT	12	1057.71	Afamin OS=Rattus norvegicus GN=Afm PE=2 SV=1	1.45353e+07	1.72169e+07	2.11858e+07	2.10635e+07	2.70315e+07	4.14413e+07
ALBU_RAT	50	7354.67	Serum albumin OS=Rattus norvegicus GN=Alb PE=1 SV=2	9.5312e+08	1.29545e+09	1.32115e+09	5.24216e+09	3.97219e+09	7.13422e+09
AMBP_RAT	12	1396.64	Protein AMBP OS=Rattus norvegicus GN=Ambp PE=1 SV=1	1.91801e+08	2.69932e+08	2.54014e+08	1.67852e+08	1.04903e+08	1.23019e+08
AMPE_RAT	5	479.18	Glutamyl aminopeptidase OS=Rattus norvegicus GN=Enpep PE=1 SV=2	2.26256e+06	3.67162e+06	5.02756e+06	1.09025e+06	1.4589e+06	2.39952e+06
AMPN_RAT	11	1267.07	Aminopeptidase N OS=Rattus norvegicus GN=Anpep PE=1 SV=2	1.41608e+07	1.6172e+07	2.09344e+07	5.81607e+06	3.70028e+06	3.6727e+06
AMYP_RAT	5	689.82	Pancreatic alpha-amylase OS=Rattus norvegicus GN=Amy2 PE=2 SV=2	2.48744e+06	8.47557e+07	6.19948e+07	2.37509e+06	4.65588e+07	5.35548e+07
ANGT_RAT	6	501	Angiotensinogen OS=Rattus norvegicus GN=Agt PE=1 SV=1	4.43265e+06	997055	1.83925e+06	7.57167e+06	734360	1.86239e+06
ANTR1_RAT	2	140.72	Anthrax toxin receptor 1 OS=Rattus norvegicus GN=Antxr1 PE=2 SV=2	862052	1.06936e+06	1.19417e+06	321296	85772.8	580419
APOA1_RAT	7	827.16	Apolipoprotein A-I OS=Rattus norvegicus GN=Apoa1 PE=1 SV=2	896844	383646	247686	8.15065e+06	713721	7.88737e+06
APOA4_RAT	6	432.22	Apolipoprotein A-IV OS=Rattus norvegicus GN=Apoa4 PE=2 SV=2	385799	1.01264e+06	430812	1.66173e+06	563000	1.99171e+06
APOE_RAT	4	476.84	Apolipoprotein E OS=Rattus norvegicus GN=Apoe PE=1 SV=2	6.09523e+06	9.52413e+06	5.1631e+06	2.10645e+06	2.38388e+06	5.33476e+06
APOH_RAT	5	494.18	Beta-2-glycoprotein 1 OS=Rattus norvegicus GN=Apoh PE=2 SV=2	1.06895e+06	1.66578e+06	3.22278e+06	4.56768e+06	1.41521e+06	6.3009e+06
APOM_RAT	2	195.51	Apolipoprotein M OS=Rattus norvegicus GN=Apom PE=1 SV=2	1.67905e+06	1.77724e+06	3.00487e+06	1.30821e+06	1.04867e+06	1.4952e+06
B2MG_RAT	4	587.32	Beta-2-microglobulin OS=Rattus norvegicus GN=B2m PE=1 SV=1	9.80047e+06	4.53927e+06	7.3892e+06	3.15347e+07	6.22069e+06	1.17342e+07
BGLR_RAT	8	847.36	Beta-glucuronidase OS=Rattus norvegicus GN=Gusb PE=2 SV=1	1.16285e+07	279318	3.42514e+06	1.68356e+07	1.33157e+06	5.29938e+07
CADH1_RAT	14	2106.98	Cadherin-1 OS=Rattus norvegicus GN=Cdh1 PE=1 SV=1	2.35779e+08	3.55878e+08	2.63778e+08	1.65802e+08	1.74141e+08	2.12313e+08
CALM_RAT	2	279.88	Calmodulin OS=Rattus norvegicus GN=Calm1 PE=1 SV=2	135063	458568	1.37709e+06	373264	795400	79121.9
CATB_RAT	13	1688.03	Cathepsin B OS=Rattus norvegicus GN=Ctsb PE=1 SV=2	9.8085e+06	3.69786e+06	4.7985e+06	1.84957e+07	2.57879e+06	4.41584e+06
CATC_RAT	4	571.73	Dipeptidyl peptidase 1 OS=Rattus norvegicus GN=Ctsc PE=1 SV=3	5.37386e+06	3.04181e+06	5.48651e+06	7.35129e+06	3.03137e+06	4.82202e+06
CATD_RAT	3	366.62	Cathepsin D OS=Rattus norvegicus GN=Ctsd PE=1 SV=1	5.47426e+06	1.58107e+06	4.01421e+06	3.27947e+06	952849	2.59936e+06
CATL1_RAT	3	185.86	Cathepsin L1 OS=Rattus norvegicus GN=Ctsl1 PE=1 SV=2	2.46176e+06	5.39152e+06	1.89596e+06	1.01044e+06	1.67174e+06	476817
CBG_RAT	2	107.25	Corticosteroid-binding globulin OS=Rattus norvegicus GN=Serpina6 PE=1 SV=2	1.43289e+06	2.21853e+06	1.53385e+07	988779	2.53353e+06	1.02821e+07
CBPQ_RAT	13	1703.95	Carboxypeptidase Q OS=Rattus norvegicus GN=Cpq PE=1 SV=1	3.08422e+07	7.55907e+06	1.48616e+07	6.6464e+07	1.74826e+07	1.58132e+07
CD14_RAT	4	426.77	Monocyte differentiation antigen CD14 OS=Rattus norvegicus GN=Cd14 PE=2 SV=2	1.42307e+06	2.32867e+06	1.17654e+06	596902	1.67976e+06	527378
CD44_RAT	2	220.14	CD44 antigen OS=Rattus norvegicus GN=Cd44 PE=1 SV=2	1.38084e+07	1.16824e+07	1.27765e+07	4.7615e+06	4.76086e+06	4.94242e+06
CD48_RAT	2	147.9	CD48 antigen OS=Rattus norvegicus GN=Cd48 PE=1 SV=1	1.76618e+06	6.44477e+06	2.97685e+06	1.52526e+06	2.25325e+06	2.30535e+06
CD59_RAT	2	178.38	CD59 glycoprotein OS=Rattus norvegicus GN=Cd59 PE=1 SV=2	8.93871e+06	4.45414e+06	1.04047e+07	5.63102e+06	3.22403e+06	4.80708e+06
CDHR5_RAT	2	147.92	Cadherin-related family member 5 OS=Rattus norvegicus GN=Cdhr5 PE=1 SV=1	1.37915e+06	1.7032e+06	3.24847e+06	373391	509307	409522
CERU_RAT	8	688.53	Ceruloplasmin OS=Rattus norvegicus GN=Cp PE=1 SV=3	1.24108e+06	3.12568e+06	2.91721e+06	6.1402e+06	6.07154e+06	1.81312e+07
CFAD_RAT	7	1315.58	Complement factor D OS=Rattus norvegicus GN=Cfd PE=1 SV=2	7.58969e+07	3.14596e+07	3.27507e+07	1.68429e+08	7.42795e+07	1.2849e+08
CLUS_RAT	5	526.16	Clusterin OS=Rattus norvegicus GN=Clu PE=1 SV=2	8.7525e+06	5.3891e+06	4.63321e+06	2.85008e+06	2.80105e+06	2.73286e+06
CO3_RAT	12	1315.69	Complement C3 OS=Rattus norvegicus GN=C3 PE=1 SV=3	1.94347e+06	973814	2.94766e+06	1.39932e+07	1.12582e+06	3.56678e+07
CO4_RAT	6	670.84	Complement C4 OS=Rattus norvegicus GN=C4 PE=1 SV=3	4.68179e+06	3.50485e+06	6.03517e+06	5.12019e+06	5.93055e+06	1.59043e+07
COL12_RAT	2	183.74	Collectin-12 OS=Rattus norvegicus GN=Colec12 PE=2 SV=1	961701	764565	952825	850592	684692	1.63405e+06
CUBN_RAT	4	397.84	Cubilin OS=Rattus norvegicus GN=Cubn PE=1 SV=2	627235	651107	3.17646e+06	360768	584653	1.96353e+06
CYTC_RAT	5	806.48	Cystatin-C OS=Rattus norvegicus GN=Cst3 PE=1 SV=2	3.96424e+07	1.93051e+07	4.76791e+07	3.45622e+07	1.67819e+07	3.60195e+07
DIAC_RAT	5	620.89	Di-N-acetylchitobiase OS=Rattus norvegicus GN=Ctbs PE=1 SV=1	3.39234e+06	3.88525e+06	6.19159e+06	2.71717e+06	3.52087e+06	7.55457e+06
DNAS1_RAT	7	960.16	Deoxyribonuclease-1 OS=Rattus norvegicus GN=Dnase1 PE=2 SV=1	1.80192e+08	5.68269e+07	5.50355e+07	9.29868e+07	4.01427e+07	1.47151e+07
DPP2_RAT	5	675.05	Dipeptidyl peptidase 2 OS=Rattus norvegicus GN=Dpp7 PE=1 SV=1	6.18609e+06	1.76387e+07	2.86593e+07	6.06502e+06	2.29916e+07	3.52984e+07
DPP4_RAT	5	404.87	Dipeptidyl peptidase 4 OS=Rattus norvegicus GN=Dpp4 PE=1 SV=2	3.71913e+06	7.297e+06	1.75133e+07	2.36209e+06	5.38683e+06	8.09588e+06
EGF_RAT	28	3291.77	Pro-epidermal growth factor OS=Rattus norvegicus GN=Egf PE=1 SV=2	2.10738e+08	2.90994e+08	2.4969e+08	8.43838e+07	1.0467e+08	1.03755e+08
ENOA_RAT	6	609.54	Alpha-enolase OS=Rattus norvegicus GN=Eno1 PE=1 SV=4	999160	297295	4.07829e+06	3.25983e+06	129696	1.42679e+06
ESAM_RAT	2	211.42	Endothelial cell-selective adhesion molecule OS=Rattus norvegicus GN=Esam PE=2 SV=1	1.94506e+06	5.71863e+06	5.72099e+06	1.094e+06	2.61963e+06	3.29293e+06
EST1C_RAT	7	739.64	Carboxylesterase 1C OS=Rattus norvegicus GN=Ces1c PE=1 SV=3	6.83782e+06	4.35498e+06	6.76643e+06	2.38498e+07	1.71958e+07	3.1259e+07
EZRI_RAT	3	333.79	Ezrin OS=Rattus norvegicus GN=Ezr PE=1 SV=3	1.78183e+06	214434	441406	1.35164e+06	955378	52133.8
F151A_RAT	2	163	Protein FAM151A OS=Rattus norvegicus GN=Fam151a PE=2 SV=1	647478	808385	1.37002e+06	431766	516570	702357
FBLN3_RAT	4	389.2	EGF-containing fibulin-like extracellular matrix protein 1 OS=Rattus norvegicus GN=Efemp1 PE=1 SV=1	8.96819e+06	1.64146e+07	1.71858e+07	3.09864e+06	1.09664e+07	6.84572e+06
FETUA_RAT	7	1058.75	Alpha-2-HS-glycoprotein OS=Rattus norvegicus GN=Ahsg PE=1 SV=2	4.49883e+07	1.36559e+08	1.34657e+08	5.50516e+07	9.61984e+07	1.00954e+08
FETUB_RAT	4	472.2	Fetuin-B OS=Rattus norvegicus GN=Fetub PE=2 SV=2	1.18546e+06	9.95287e+06	1.14695e+07	6.4479e+06	4.02169e+06	1.48365e+07
FINC_RAT	8	736	Fibronectin OS=Rattus norvegicus GN=Fn1 PE=1 SV=2	4.92387e+06	2.63719e+07	3.63618e+07	2.7967e+06	9.84536e+06	1.41537e+07
G3P_RAT	3	231.17	Glyceraldehyde-3-phosphate dehydrogenase OS=Rattus norvegicus GN=Gapdh PE=1 SV=3	535204	412367	1.8623e+06	1.15131e+06	373026	394759
GELS_RAT	9	1442.81	Gelsolin OS=Rattus norvegicus GN=Gsn PE=1 SV=1	7.9959e+07	2.57926e+07	3.62244e+07	8.63828e+07	3.70704e+07	5.53285e+07
GGH_RAT	6	386.04	Gamma-glutamyl hydrolase OS=Rattus norvegicus GN=Ggh PE=1 SV=1	1.37484e+07	6.25022e+06	1.36364e+07	6.29178e+06	2.06817e+06	4.09431e+06
GGT1_RAT	6	575.19	Gamma-glutamyltranspeptidase 1 OS=Rattus norvegicus GN=Ggt1 PE=1 SV=4	3.95488e+06	4.00448e+06	1.55924e+07	2.19465e+06	1.65409e+06	4.26056e+06
GILT_RAT	4	425.27	Gamma-interferon-inducible lysosomal thiol reductase OS=Rattus norvegicus GN=Ifi30 PE=2 SV=1	6.2752e+06	4.27982e+06	4.60345e+06	3.98955e+06	2.70669e+06	2.13002e+06
GPX3_RAT	3	252.03	Glutathione peroxidase 3 OS=Rattus norvegicus GN=Gpx3 PE=2 SV=2	1.21003e+06	466055	623475	1.02241e+06	398496	235784
GRN_RAT	2	129.36	Granulins OS=Rattus norvegicus GN=Grn PE=1 SV=3	340363	1.14348e+07	1.09125e+07	1.35485e+06	3.58333e+06	9.88825e+06
HA11_RAT	3	226.09	Class I histocompatibility antigen, Non-RT1.A alpha-1 chain OS=Rattus norvegicus GN=RT1-Aw2 PE=1 SV=1	1.15312e+06	1.92951e+06	2.14912e+06	1.04261e+06	2.0707e+06	3.95393e+06
HBA_RAT	2	77.51	Hemoglobin subunit alpha-1/2 OS=Rattus norvegicus GN=Hba1 PE=1 SV=3	202440	8.48988e+06	1.86885e+06	32169.1	233190	1.27137e+06
HEMO_RAT	16	1967.13	Hemopexin OS=Rattus norvegicus GN=Hpx PE=1 SV=3	9.83956e+07	5.41709e+07	9.95742e+07	1.66147e+08	5.09453e+07	1.57009e+08
HPT_RAT	10	1242.24	Haptoglobin OS=Rattus norvegicus GN=Hp PE=1 SV=3	4.05133e+06	1.10926e+06	2.54935e+06	1.67468e+07	596631	9.70359e+06
HSP7C_RAT	5	358.2	Heat shock cognate 71 kDa protein OS=Rattus norvegicus GN=Hspa8 PE=1 SV=1	662973	525296	1.57391e+06	1.40317e+06	800890	609992
IGG2A_RAT	11	1008.74	Ig gamma-2A chain C region OS=Rattus norvegicus GN=Igg-2a PE=1 SV=1	7.91639e+06	5.34113e+06	9.81809e+06	1.7643e+07	4.01474e+06	1.76362e+07
IGG2B_RAT	9	815.13	Ig gamma-2B chain C region OS=Rattus norvegicus GN=Igh-1a PE=1 SV=1	442437	872124	461316	3.16727e+06	2.89891e+06	4.20386e+06
JAM1_RAT	2	111.65	Junctional adhesion molecule A OS=Rattus norvegicus GN=F11r PE=2 SV=1	1.84627e+06	8.22655e+06	4.94466e+06	414208	2.59167e+06	2.24468e+06
K2C1_RAT	3	269.96	Keratin, type II cytoskeletal 1 OS=Rattus norvegicus GN=Krt1 PE=2 SV=1	3.71348e+06	627865	2.98794e+06	6.88716e+06	410784	6.89108e+06
K2C6A_RAT	3	303.3	Keratin, type II cytoskeletal 6A OS=Rattus norvegicus GN=Krt6a PE=1 SV=1	908689	517952	580223	1.6968e+06	218562	1.48964e+06
KACB_RAT	12	1822.29	Ig kappa chain C region, B allele OS=Rattus norvegicus PE=1 SV=1	1.01643e+09	1.04076e+09	1.26233e+09	6.12562e+08	4.27119e+08	1.13372e+09
KLK1_RAT	7	1216.92	Kallikrein-1 OS=Rattus norvegicus GN=Ngfg PE=2 SV=2	1.60759e+08	1.7326e+08	1.75474e+08	7.73168e+07	5.28285e+07	5.3138e+07
KLK7_RAT	6	904.32	Glandular kallikrein-7, submandibular/renal OS=Rattus norvegicus GN=Klk7 PE=1 SV=1	6.22171e+07	7.40211e+07	7.47863e+07	3.01426e+07	3.37112e+07	2.13818e+07
KLK9_RAT	11	1740.82	Submandibular glandular kallikrein-9 OS=Rattus norvegicus GN=Klk9 PE=1 SV=1	1.64634e+08	2.11069e+07	1.46398e+07	4.95323e+07	8.28127e+07	1.12353e+06
KNT1_RAT	4	593.84	T-kininogen 1 OS=Rattus norvegicus GN=Map1 PE=1 SV=2	1.23096e+07	204490	644611	1.87863e+07	439790	2.14873e+06
KVX01_RAT	4	549.17	Ig kappa chain V region S211 OS=Rattus norvegicus PE=1 SV=1	7.15441e+07	2.38706e+07	1.5499e+07	4.52925e+07	9.81622e+06	7.53585e+06
LAC2_RAT	6	1015.36	Ig lambda-2 chain C region OS=Rattus norvegicus PE=2 SV=1	1.85728e+08	1.15545e+08	1.72021e+08	1.35608e+08	5.998e+07	1.47216e+08
LG3BP_RAT	3	141.42	Galectin-3-binding protein OS=Rattus norvegicus GN=Lgals3bp PE=1 SV=2	665921	1.67632e+06	9.45372e+06	443832	626823	6.43273e+06
LRP2_RAT	27	2785.05	Low-density lipoprotein receptor-related protein 2 OS=Rattus norvegicus GN=Lrp2 PE=1 SV=1	5.12865e+07	4.11608e+07	6.38038e+07	2.44222e+07	1.14336e+07	3.07009e+07
LYAG_RAT	7	693.45	Lysosomal alpha-glucosidase OS=Rattus norvegicus GN=Gaa PE=2 SV=1	3.92028e+06	4.50679e+06	5.72322e+06	2.80206e+06	5.85333e+06	5.15272e+06
MDHC_RAT	3	267.24	Malate dehydrogenase, cytoplasmic OS=Rattus norvegicus GN=Mdh1 PE=1 SV=3	815337	323655	1.81673e+06	1.24124e+06	708161	438465
MEP1A_RAT	12	1650.05	Meprin A subunit alpha OS=Rattus norvegicus GN=Mep1a PE=1 SV=2	3.37948e+07	2.85375e+07	3.05379e+07	1.26264e+07	7.93224e+06	8.8563e+06
MEP1B_RAT	6	820.82	Meprin A subunit beta OS=Rattus norvegicus GN=Mep1b PE=1 SV=3	5.06394e+06	8.05477e+06	7.60623e+06	1.42696e+06	1.64526e+06	696859
MINP1_RAT	3	206.85	Multiple inositol polyphosphate phosphatase 1 OS=Rattus norvegicus GN=Minpp1 PE=1 SV=3	649549	746946	894848	142910	222565	117694
MUG1_RAT	15	1452.87	Murinoglobulin-1 OS=Rattus norvegicus GN=Mug1 PE=2 SV=1	1.43065e+06	2.98443e+06	2.71669e+06	3.78814e+06	3.80656e+06	8.58082e+06
MUP_RAT	13	1911.9	Major urinary protein OS=Rattus norvegicus PE=1 SV=1	9.15918e+08	6.17325e+07	2.25523e+07	1.06377e+09	1.44986e+08	6.39004e+07
MXRA8_RAT	8	832.16	Matrix-remodeling-associated protein 8 OS=Rattus norvegicus GN=Mxra8 PE=2 SV=1	2.22517e+07	2.95557e+07	3.0851e+07	7.94702e+06	9.49419e+06	1.18658e+07
NEP_RAT	11	1069.49	Neprilysin OS=Rattus norvegicus GN=Mme PE=1 SV=2	7.13513e+06	1.12538e+06	6.19629e+06	2.58292e+06	3.14809e+06	790765
NID2_RAT	2	247.73	Nidogen-2 OS=Rattus norvegicus GN=Nid2 PE=2 SV=1	597701	1.86377e+06	882942	636833	1.60038e+06	124694
NOV_RAT	2	113.32	Protein NOV homolog OS=Rattus norvegicus GN=Nov PE=1 SV=1	191169	164023	623582	564247	373509	664268
NUCB1_RAT	3	170.35	Nucleobindin-1 OS=Rattus norvegicus GN=Nucb1 PE=1 SV=1	424613	1.29951e+06	1.59769e+06	347609	385555	333086
OSTP_RAT	4	515.47	Osteopontin OS=Rattus norvegicus GN=Spp1 PE=1 SV=2	2.66867e+06	1.46914e+07	1.19788e+07	1.70399e+07	1.22526e+07	1.45562e+07
PARK7_RAT	2	187.26	Protein DJ-1 OS=Rattus norvegicus GN=Park7 PE=1 SV=1	575975	140139	624028	3.17327e+06	1.06162e+06	355679
PBAS_RAT	7	922.07	Probasin OS=Rattus norvegicus GN=Pbsn PE=1 SV=1	6.42566e+07	5.28575e+06	3.1737e+06	2.0028e+06	1.35845e+07	3.89402e+07
PDC6I_RAT	2	225.54	Programmed cell death 6-interacting protein OS=Rattus norvegicus GN=Pdcd6ip PE=1 SV=2	189516	238885	156960	353344	265037	226209
PEBP1_RAT	8	830.36	Phosphatidylethanolamine-binding protein 1 OS=Rattus norvegicus GN=Pebp1 PE=1 SV=3	3.2655e+06	319481	1.64871e+06	1.14322e+07	254163	310405
PIGR_RAT	12	1421.95	Polymeric immunoglobulin receptor OS=Rattus norvegicus GN=Pigr PE=2 SV=1	1.82443e+07	1.30493e+07	1.60805e+07	6.96518e+06	5.725e+06	7.37953e+06
PLBL2_RAT	3	337.7	Putative phospholipase B-like 2 OS=Rattus norvegicus GN=Plbd2 PE=1 SV=2	2.11778e+06	538773	936766	1.47589e+06	248041	311088
PLMN_RAT	29	2947.79	Plasminogen OS=Rattus norvegicus GN=Plg PE=2 SV=2	3.83595e+07	9.24712e+07	1.00563e+08	8.37052e+07	4.69245e+07	1.10824e+08
PPAL_RAT	5	334.5	Lysosomal acid phosphatase OS=Rattus norvegicus GN=Acp2 PE=1 SV=1	1.64775e+06	2.24439e+06	2.4655e+06	1.85819e+06	2.47572e+06	2.68997e+06
PSC1_RAT	10	1442.9	Prostatic steroid-binding protein C1 OS=Rattus norvegicus GN=Psbpc1 PE=1 SV=1	5.21884e+08	1.05779e+08	8.32439e+07	1.55966e+08	4.50817e+08	1.32574e+06
PSC2_RAT	2	419.86	Prostatic steroid-binding protein C2 OS=Rattus norvegicus GN=Psbpc2 PE=1 SV=1	5.36919e+08	1.07145e+08	6.82837e+07	1.54977e+08	4.82241e+08	2.63572e+06
PTGDS_RAT	2	215.08	Prostaglandin-H2 D-isomerase OS=Rattus norvegicus GN=Ptgds PE=1 SV=2	2.03987e+06	9.71794e+06	1.07454e+07	1.97497e+06	5.00243e+06	3.3991e+06
QSOX1_RAT	4	206.18	Sulfhydryl oxidase 1 OS=Rattus norvegicus GN=Qsox1 PE=1 SV=1	1.94564e+06	1.92784e+06	1.54743e+06	640304	2.14605e+06	837889
REG3G_RAT	4	620.45	Regenerating islet-derived protein 3-gamma OS=Rattus norvegicus GN=Reg3g PE=1 SV=1	1.51453e+08	7.67583e+07	5.51549e+07	3.13224e+08	1.8961e+08	3.26624e+07
RISC_RAT	6	912.38	Retinoid-inducible serine carboxypeptidase OS=Rattus norvegicus GN=Scpep1 PE=2 SV=1	1.92445e+07	974773	2.9313e+06	3.81738e+07	2.44425e+06	2.08622e+06
RNAS4_RAT	3	309.93	Ribonuclease 4 OS=Rattus norvegicus GN=Rnase4 PE=1 SV=1	800265	208868	652030	2.81128e+06	390577	2.14181e+06
ROB1_RAT	2	297.4	Protein RoBo-1 OS=Rattus norvegicus PE=1 SV=1	1.97114e+06	2.58165e+06	4.1305e+06	937143	722720	4.21612e+06
SAMP_RAT	3	346.05	Serum amyloid P-component OS=Rattus norvegicus GN=Apcs PE=2 SV=2	2.48863e+06	7.26315e+06	1.56418e+07	2.97508e+06	6.27469e+06	9.84886e+06
SAP_RAT	5	667.24	Sulfated glycoprotein 1 OS=Rattus norvegicus GN=Psap PE=1 SV=1	4.17993e+06	7.7079e+06	1.50415e+07	1.55855e+07	6.74034e+06	1.81411e+07
SG2A2_RAT	3	669.39	Secretoglobin family 2A member 2 OS=Rattus norvegicus GN=Scgb2a2 PE=1 SV=1	4.18955e+08	1.17315e+08	1.27832e+08	1.74946e+08	4.69898e+08	3.65253e+06
SLC31_RAT	4	252.28	Neutral and basic amino acid transport protein rBAT OS=Rattus norvegicus GN=Slc3a1 PE=1 SV=1	5.40339e+06	4.16892e+06	5.10474e+06	2.17264e+06	1.52977e+06	1.13439e+06
SODC_RAT	7	1041.98	Superoxide dismutase [Cu-Zn] OS=Rattus norvegicus GN=Sod1 PE=1 SV=2	2.30137e+07	2.63509e+07	6.20994e+07	3.14492e+07	5.19307e+07	8.7267e+07
SPA3K_RAT	12	1571.97	Serine protease inhibitor A3K OS=Rattus norvegicus GN=Serpina3k PE=1 SV=3	6.24912e+07	2.35841e+08	2.97949e+08	5.2736e+07	1.68535e+08	2.34438e+08
SPA3L_RAT	21	2523.15	Serine protease inhibitor A3L OS=Rattus norvegicus GN=Serpina3l PE=1 SV=3	1.97131e+08	2.14815e+08	2.39559e+08	1.74711e+08	2.47329e+08	1.54302e+08
SPA3N_RAT	4	600.65	Serine protease inhibitor A3N OS=Rattus norvegicus GN=Serpina3n PE=1 SV=3	178178	1.11693e+06	1.21898e+06	1.2748e+06	698328	2.65758e+06
SPBP_RAT	4	725.38	Prostatic spermine-binding protein OS=Rattus norvegicus GN=Sbp PE=1 SV=1	2.20663e+07	7.09261e+06	8.12806e+06	1.02255e+07	6.98338e+07	748409
THRB_RAT	5	470.12	Prothrombin OS=Rattus norvegicus GN=F2 PE=1 SV=1	2.50679e+07	5.3747e+07	5.20929e+07	2.76944e+07	3.6125e+07	6.76519e+07
TPIS_RAT	3	266.76	Triosephosphate isomerase OS=Rattus norvegicus GN=Tpi1 PE=1 SV=2	913184	232773	1.76015e+06	2.73167e+06	95838.3	554122
TRFE_RAT	33	3931.31	Serotransferrin OS=Rattus norvegicus GN=Tf PE=1 SV=3	3.94515e+07	9.8962e+07	8.12566e+07	2.69822e+08	2.1254e+08	3.53421e+08
UP1_RAT	4	469.42	Urinary protein 1 OS=Rattus norvegicus PE=1 SV=1	3.40704e+08	9.50528e+08	5.07599e+08	8.83306e+08	3.82608e+08	6.05606e+08
UP2_RAT	4	970.23	Urinary protein 2 OS=Rattus norvegicus PE=1 SV=1	4.46215e+09	2.08627e+09	1.44551e+09	3.83671e+09	1.27429e+09	1.48232e+09
UP3_RAT	2	503.35	Urinary protein 3 OS=Rattus norvegicus PE=2 SV=1	1.04009e+07	5.14053e+08	8.49252e+07	1.75606e+07	3.3956e+08	8.98707e+07
UROK_RAT	8	786.49	Urokinase-type plasminogen activator OS=Rattus norvegicus GN=Plau PE=1 SV=1	1.42241e+07	1.64436e+07	2.59525e+07	5.67523e+06	7.47557e+06	9.52068e+06
UROM_RAT	19	2325.44	Uromodulin OS=Rattus norvegicus GN=Umod PE=2 SV=1	4.49526e+08	2.77884e+08	5.12631e+08	1.50145e+08	5.31781e+07	7.2982e+07
VCAM1_RAT	5	263.94	Vascular cell adhesion protein 1 OS=Rattus norvegicus GN=Vcam1 PE=2 SV=1	3.20636e+06	855453	526352	2.43344e+06	925448	362448
VOME_RAT	2	107.15	Vomeromodulin (Fragment) OS=Rattus norvegicus PE=2 SV=1	433500	905491	1.56339e+06	10303.5	15970.2	26942.4
VTDB_RAT	10	863.08	Vitamin D-binding protein OS=Rattus norvegicus GN=Gc PE=1 SV=3	3.82251e+06	7.48585e+06	1.02957e+07	1.68966e+07	5.22386e+06	2.52322e+07
WFDC2_RAT	7	921.41	WAP four-disulfide core domain protein 2 OS=Rattus norvegicus GN=Wfdc2 PE=2 SV=1	6.08052e+06	1.07655e+07	1.81503e+07	5.85195e+06	4.42151e+06	7.96923e+06
ZA2G_RAT	3	210.73	Zinc-alpha-2-glycoprotein OS=Rattus norvegicus GN=Azgp1 PE=2 SV=1	58368.5	186753	108694	871031	517036	613610

## Sheet: chloral hydrate group
"B"means normal urine while "A" means urine with anesthesia
				Normalized abundance
Accession	Peptide count	Confidence score	Description	B7	B8	B9	A7	A8	A9
22P1_RAT	11	1083.79	Cystatin-related protein 1 OS=Rattus norvegicus GN=Andpro PE=1 SV=1	6.05307e+08	1.73957e+07	4.42223e+06	2.02465e+07	6.53213e+06	3.95698e+06
22P2_RAT	7	720.43	Cystatin-related protein 2 OS=Rattus norvegicus GN=Crp2 PE=2 SV=1	1.17206e+08	510353	805037	3.55186e+06	137916	2.51359e+06
6PGL_RAT	8	837.73	6-phosphogluconolactonase OS=Rattus norvegicus GN=Pgls PE=1 SV=1	3.88672e+07	6.10857e+06	1.97009e+06	5.69577e+07	1.19725e+07	5.58903e+06
A1AG_RAT	3	225.98	Alpha-1-acid glycoprotein OS=Rattus norvegicus GN=Orm1 PE=2 SV=1	1.86958e+06	2.07373e+06	727636	3.80246e+06	1.97803e+06	1.55713e+06
A1AT_RAT	20	2524.47	Alpha-1-antiproteinase OS=Rattus norvegicus GN=Serpina1 PE=1 SV=2	9.31706e+06	4.02218e+06	8.32832e+06	3.16662e+07	3.22227e+07	2.74106e+07
A1I3_RAT	19	1251.69	Alpha-1-inhibitor 3 OS=Rattus norvegicus GN=A1i3 PE=1 SV=1	1.09998e+07	5.02375e+06	1.81503e+06	3.71751e+06	7.40953e+06	2.05565e+06
A1M_RAT	34	3422.28	Alpha-1-macroglobulin OS=Rattus norvegicus GN=A1m PE=1 SV=1	2.05652e+08	3.64163e+07	1.17775e+07	4.01118e+07	1.03188e+07	7.69158e+06
ABHEB_RAT	4	481.44	Alpha/beta hydrolase domain-containing protein 14B OS=Rattus norvegicus GN=Abhd14b PE=2 SV=1	4.36275e+06	1.40419e+06	366461	1.10279e+07	4.35367e+06	626264
ACTB_RAT;ACTG_RAT	5	452.95	Actin, cytoplasmic 1 OS=Rattus norvegicus GN=Actb PE=1 SV=1	2.35366e+07	1.94191e+07	2.63944e+06	1.2473e+07	2.18916e+07	1.54068e+06
ACY1A_RAT	2	135.37	Aminoacylase-1A OS=Rattus norvegicus GN=Acy1a PE=1 SV=1	530260	966052	52684.3	930337	623859	60383
ACYP2_RAT	4	366.43	Acylphosphatase-2 OS=Rattus norvegicus GN=Acyp2 PE=1 SV=2	671105	160619	15369.9	5.29216e+06	1.04792e+06	769752
AFAM_RAT	13	1197.18	Afamin OS=Rattus norvegicus GN=Afm PE=2 SV=1	5.60631e+07	6.55745e+06	4.89448e+06	2.42409e+07	1.27602e+07	1.05147e+07
ALBU_RAT	62	8080.75	Serum albumin OS=Rattus norvegicus GN=Alb PE=1 SV=2	3.73935e+09	9.54171e+08	6.76431e+08	8.65856e+09	4.83379e+09	1.08558e+09
ALDOB_RAT	9	898.45	Fructose-bisphosphate aldolase B OS=Rattus norvegicus GN=Aldob PE=1 SV=2	4.23802e+06	969995	149507	4.36423e+07	1.25916e+06	27636
AMBP_RAT	16	1601.75	Protein AMBP OS=Rattus norvegicus GN=Ambp PE=1 SV=1	2.59501e+08	1.43483e+08	9.46494e+07	7.16177e+07	3.95502e+07	6.77453e+07
AMPE_RAT	11	840.41	Glutamyl aminopeptidase OS=Rattus norvegicus GN=Enpep PE=1 SV=2	1.92293e+07	1.50946e+07	1.16044e+06	7.12216e+06	2.56754e+08	354351
AMPN_RAT	13	1207.84	Aminopeptidase N OS=Rattus norvegicus GN=Anpep PE=1 SV=2	2.69013e+07	1.22524e+07	5.01103e+06	7.44982e+06	2.74754e+08	2.89824e+06
AMYP_RAT	2	210.68	Pancreatic alpha-amylase OS=Rattus norvegicus GN=Amy2 PE=2 SV=2	2.38424e+06	6.33956e+07	2.4015e+07	607489	4.12559e+07	2.02082e+07
ANGT_RAT	3	247.71	Angiotensinogen OS=Rattus norvegicus GN=Agt PE=1 SV=1	4.26273e+06	277063	268511	928333	259756	418901
APOE_RAT	2	163.79	Apolipoprotein E OS=Rattus norvegicus GN=Apoe PE=1 SV=2	2.61106e+06	896143	1.98406e+06	1.30476e+06	172041	606867
APOH_RAT	4	350.4	Beta-2-glycoprotein 1 OS=Rattus norvegicus GN=Apoh PE=2 SV=2	9.26292e+06	1.08216e+06	917594	3.10398e+06	1.80535e+06	1.22871e+06
ATRN_RAT	3	201.48	Attractin OS=Rattus norvegicus GN=Atrn PE=2 SV=1	293725	330791	93677.7	108135	174339	124908
B2MG_RAT	8	568.82	Beta-2-microglobulin OS=Rattus norvegicus GN=B2m PE=1 SV=1	8.38936e+07	3.76832e+06	1.01865e+06	6.34539e+07	6.47649e+06	5.75442e+06
BGLR_RAT	21	1784.92	Beta-glucuronidase OS=Rattus norvegicus GN=Gusb PE=2 SV=1	1.96248e+07	44864.3	70261	3.09691e+08	365611	671440
BIN1_RAT	6	425.4	Myc box-dependent-interacting protein 1 OS=Rattus norvegicus GN=Bin1 PE=1 SV=1	1.31962e+06	265056	31153.2	4.13412e+07	6.85515e+06	3.21347e+06
BTD_RAT	2	249.34	Biotinidase OS=Rattus norvegicus GN=Btd PE=2 SV=1	4.97926e+06	1.98802e+06	741527	706146	962669	399826
CADH1_RAT	19	2189.02	Cadherin-1 OS=Rattus norvegicus GN=Cdh1 PE=1 SV=1	1.03281e+08	1.4152e+08	9.8093e+07	3.82963e+07	4.07211e+07	4.65421e+07
CAH1_RAT	4	415.59	Carbonic anhydrase 1 OS=Rattus norvegicus GN=Ca1 PE=1 SV=1	1.20033e+06	4921.77	170437	2.70805e+07	788809	1.85474e+06
CAH3_RAT	17	2025.53	Carbonic anhydrase 3 OS=Rattus norvegicus GN=Ca3 PE=1 SV=3	5.80531e+06	15930.5	44296.2	2.43012e+08	1.82874e+06	1.80998e+06
CATB_RAT	9	1162.34	Cathepsin B OS=Rattus norvegicus GN=Ctsb PE=1 SV=2	1.64063e+07	2.06957e+06	826979	1.63093e+07	2.19306e+06	1.45369e+06
CATC_RAT	5	513.47	Dipeptidyl peptidase 1 OS=Rattus norvegicus GN=Ctsc PE=1 SV=3	8.4968e+06	2.80962e+06	497785	1.39193e+07	2.45627e+06	1.04084e+06
CATD_RAT	5	411.3	Cathepsin D OS=Rattus norvegicus GN=Ctsd PE=1 SV=1	9.88626e+06	2.90375e+06	780140	1.5252e+07	1.25095e+06	681774
CATH_RAT	5	321.55	Pro-cathepsin H OS=Rattus norvegicus GN=Ctsh PE=1 SV=1	4.40246e+06	169060	134837	1.3154e+07	971150	172141
CATL1_RAT	3	215.78	Cathepsin L1 OS=Rattus norvegicus GN=Ctsl1 PE=1 SV=2	4.38076e+06	4.00733e+06	4.66166e+06	1.85002e+06	1.96932e+06	523132
CBG_RAT	4	246.47	Corticosteroid-binding globulin OS=Rattus norvegicus GN=Serpina6 PE=1 SV=2	7.39214e+06	5.81892e+06	9.88151e+06	2.04041e+06	2.80832e+06	3.5577e+06
CBPQ_RAT	14	1833.29	Carboxypeptidase Q OS=Rattus norvegicus GN=Cpq PE=1 SV=1	5.78349e+06	7.15232e+06	5.91059e+06	1.66862e+07	2.60477e+07	2.85633e+07
CD14_RAT	6	652.02	Monocyte differentiation antigen CD14 OS=Rattus norvegicus GN=Cd14 PE=2 SV=2	4.49329e+06	234872	420509	1.22551e+06	192442	171975
CD320_RAT	3	344.01	CD320 antigen OS=Rattus norvegicus GN=Cd320 PE=2 SV=1	1.50488e+06	538091	198950	295181	237087	27034.9
CD44_RAT	3	261.54	CD44 antigen OS=Rattus norvegicus GN=Cd44 PE=1 SV=2	2.32371e+07	7.86717e+06	4.16412e+06	3.08851e+06	5.89327e+06	715999
CD48_RAT	2	164.8	CD48 antigen OS=Rattus norvegicus GN=Cd48 PE=1 SV=1	2.48939e+06	217260	229138	802453	142433	211746
CERU_RAT	5	392.94	Ceruloplasmin OS=Rattus norvegicus GN=Cp PE=1 SV=3	3.83509e+06	2.0539e+06	1.23275e+06	3.84215e+06	8.42719e+06	2.44296e+06
CFAD_RAT	7	1295.34	Complement factor D OS=Rattus norvegicus GN=Cfd PE=1 SV=2	1.42553e+08	3.29118e+07	7.81066e+06	3.51882e+08	3.68796e+07	1.84365e+07
CLUS_RAT	7	735.36	Clusterin OS=Rattus norvegicus GN=Clu PE=1 SV=2	2.27865e+06	1.08653e+06	3.34637e+06	396552	188903	1.55211e+06
CO3_RAT	5	650.9	Complement C3 OS=Rattus norvegicus GN=C3 PE=1 SV=3	4.90424e+06	670474	668287	3.71228e+06	827681	754326
CO4_RAT	4	242.35	Complement C4 OS=Rattus norvegicus GN=C4 PE=1 SV=3	1.53326e+06	1.1622e+07	2.22877e+06	1.72159e+07	3.6167e+07	3.12785e+07
COMP_RAT	5	356.26	Cartilage oligomeric matrix protein OS=Rattus norvegicus GN=Comp PE=1 SV=1	2.65345e+06	1.05047e+06	610160	1.46853e+06	572401	489326
CRP_RAT	3	248.72	C-reactive protein OS=Rattus norvegicus GN=Crp PE=1 SV=1	1.00171e+07	6.58892e+06	1.20559e+06	2.63088e+06	2.3699e+06	726848
CUBN_RAT	8	560.48	Cubilin OS=Rattus norvegicus GN=Cubn PE=1 SV=2	3.41159e+06	2.77961e+06	170306	2.32176e+06	5.88749e+06	80923.4
CYTC_RAT	6	755.27	Cystatin-C OS=Rattus norvegicus GN=Cst3 PE=1 SV=2	1.04351e+08	1.19989e+07	5.57679e+06	4.81648e+07	1.41491e+07	1.36608e+07
DIAC_RAT	3	285.07	Di-N-acetylchitobiase OS=Rattus norvegicus GN=Ctbs PE=1 SV=1	4.28676e+06	2.15753e+06	776352	2.46179e+06	3.1165e+06	1.12443e+06
DNAS1_RAT	7	759.01	Deoxyribonuclease-1 OS=Rattus norvegicus GN=Dnase1 PE=2 SV=1	2.6033e+08	6.68127e+07	1.92311e+07	4.14554e+07	1.70035e+07	1.24689e+07
DPP2_RAT	6	813.43	Dipeptidyl peptidase 2 OS=Rattus norvegicus GN=Dpp7 PE=1 SV=1	5.48794e+07	2.01804e+07	3.71792e+06	7.47855e+07	2.99571e+07	8.41986e+06
DPP4_RAT	12	1036.52	Dipeptidyl peptidase 4 OS=Rattus norvegicus GN=Dpp4 PE=1 SV=2	3.11491e+07	9.09503e+06	2.20396e+06	1.84555e+07	1.80699e+07	1.85079e+06
EGF_RAT	35	3900.27	Pro-epidermal growth factor OS=Rattus norvegicus GN=Egf PE=1 SV=2	1.28408e+08	1.50303e+08	1.21615e+08	2.38519e+07	4.52511e+07	5.91665e+07
ENOA_RAT	12	1070.19	Alpha-enolase OS=Rattus norvegicus GN=Eno1 PE=1 SV=4	6.03249e+06	1.91604e+06	258053	1.72274e+07	1.50366e+06	283403
ESAM_RAT	3	233.54	Endothelial cell-selective adhesion molecule OS=Rattus norvegicus GN=Esam PE=2 SV=1	8.43019e+06	1.71583e+06	1.5792e+06	2.53243e+06	620835	560124
EST1C_RAT	9	703.26	Carboxylesterase 1C OS=Rattus norvegicus GN=Ces1c PE=1 SV=3	3.13525e+07	2.58365e+06	1.61156e+06	4.55003e+07	1.91857e+07	5.58581e+06
F16P1_RAT	6	623.71	Fructose-1,6-bisphosphatase 1 OS=Rattus norvegicus GN=Fbp1 PE=1 SV=2	1.69963e+06	389620	80592.6	1.18976e+07	513621	41830.2
FBLN3_RAT	5	678.2	EGF-containing fibulin-like extracellular matrix protein 1 OS=Rattus norvegicus GN=Efemp1 PE=1 SV=1	2.89111e+07	6.45423e+06	1.64361e+06	3.58664e+06	2.17188e+06	4.62597e+06
FETUA_RAT	12	1238.43	Alpha-2-HS-glycoprotein OS=Rattus norvegicus GN=Ahsg PE=1 SV=2	4.9761e+08	1.4621e+08	3.65116e+07	1.00318e+08	5.33117e+07	3.73408e+07
FETUB_RAT	6	528.14	Fetuin-B OS=Rattus norvegicus GN=Fetub PE=2 SV=2	2.20534e+07	4.18491e+06	1.83535e+06	3.62595e+06	2.19621e+06	877974
FINC_RAT	13	1276.27	Fibronectin OS=Rattus norvegicus GN=Fn1 PE=1 SV=2	6.2047e+07	2.47483e+07	6.00892e+06	9.33052e+06	7.76997e+06	4.06642e+06
FUCO_RAT	5	352.46	Tissue alpha-L-fucosidase OS=Rattus norvegicus GN=Fuca1 PE=1 SV=1	1.71239e+06	1.4272e+06	612869	5.32169e+06	2.17193e+06	743181
G3P_RAT	4	399.69	Glyceraldehyde-3-phosphate dehydrogenase OS=Rattus norvegicus GN=Gapdh PE=1 SV=3	1.6453e+06	611424	84954.9	4.11758e+06	510409	192857
GELS_RAT	13	1459.72	Gelsolin OS=Rattus norvegicus GN=Gsn PE=1 SV=1	9.87518e+07	7.31405e+06	3.41485e+06	8.14455e+07	6.42606e+06	1.20053e+07
GGH_RAT	7	454.06	Gamma-glutamyl hydrolase OS=Rattus norvegicus GN=Ggh PE=1 SV=1	2.23344e+07	1.55496e+07	3.73344e+06	3.21482e+06	3.79734e+06	2.03371e+06
GGT1_RAT	7	719.29	Gamma-glutamyltranspeptidase 1 OS=Rattus norvegicus GN=Ggt1 PE=1 SV=4	9.18767e+06	1.08939e+07	2.07466e+06	3.73762e+06	1.87469e+07	754290
GILT_RAT	3	282.31	Gamma-interferon-inducible lysosomal thiol reductase OS=Rattus norvegicus GN=Ifi30 PE=2 SV=1	1.29668e+07	4.08058e+06	1.08252e+06	7.57079e+06	2.75304e+06	672939
GRN_RAT	4	307.3	Granulins OS=Rattus norvegicus GN=Grn PE=1 SV=3	2.13927e+07	1.10734e+07	1.50815e+06	6.90264e+06	9.68612e+06	3.00291e+06
GSH1_RAT	3	167.9	Glutamate--cysteine ligase catalytic subunit OS=Rattus norvegicus GN=Gclc PE=1 SV=2	2.39121e+06	1.20663e+06	210373	461857	1.65478e+06	27996.8
HA11_RAT	5	236.25	Class I histocompatibility antigen, Non-RT1.A alpha-1 chain OS=Rattus norvegicus GN=RT1-Aw2 PE=1 SV=1	732186	2.24117e+06	431862	401235	3.65737e+06	573798
HA12_RAT	5	272.21	RT1 class I histocompatibility antigen, AA alpha chain OS=Rattus norvegicus PE=1 SV=2	4.61508e+06	352862	472918	1.30831e+06	326946	376667
HEMO_RAT	15	1573.43	Hemopexin OS=Rattus norvegicus GN=Hpx PE=1 SV=3	2.79692e+08	2.73177e+07	1.23785e+07	1.44774e+08	4.86932e+07	1.32177e+07
HSP7C_RAT	7	482.45	Heat shock cognate 71 kDa protein OS=Rattus norvegicus GN=Hspa8 PE=1 SV=1	1.24604e+06	522881	149462	2.90131e+06	283251	73820.2
IGG2A_RAT	10	606.77	Ig gamma-2A chain C region OS=Rattus norvegicus GN=Igg-2a PE=1 SV=1	1.51484e+07	5.36119e+06	2.85937e+06	1.03936e+07	8.74918e+06	3.16284e+06
IGG2B_RAT	7	524.51	Ig gamma-2B chain C region OS=Rattus norvegicus GN=Igh-1a PE=1 SV=1	1.1864e+07	3.11915e+06	1.66537e+06	3.07385e+07	1.13748e+07	2.42345e+06
IGG2C_RAT	3	212.39	Ig gamma-2C chain C region OS=Rattus norvegicus PE=2 SV=1	1.13569e+07	418396	271303	8.62784e+06	524241	377487
JAM1_RAT	4	316.18	Junctional adhesion molecule A OS=Rattus norvegicus GN=F11r PE=2 SV=1	1.30141e+07	1.27581e+06	870738	4.0013e+06	299471	288701
K1C10_RAT	4	300.7	Keratin, type I cytoskeletal 10 OS=Rattus norvegicus GN=Krt10 PE=2 SV=1	132949	58708.2	25224.7	1.22235e+06	114910	148903
KACB_RAT	16	1754.52	Ig kappa chain C region, B allele OS=Rattus norvegicus PE=1 SV=1	6.03797e+08	9.03122e+08	3.00973e+08	3.1931e+08	3.98918e+08	2.74771e+08
KLK1_RAT	13	1808.24	Kallikrein-1 OS=Rattus norvegicus GN=Ngfg PE=2 SV=2	9.23365e+07	6.56602e+07	8.69813e+07	1.23044e+07	2.41919e+07	4.35173e+07
KLK7_RAT	14	1759.07	Glandular kallikrein-7, submandibular/renal OS=Rattus norvegicus GN=Klk7 PE=1 SV=1	2.70886e+08	4.72617e+07	1.1234e+07	4.31917e+07	1.39642e+07	7.57681e+06
KLK9_RAT	10	1063.39	Submandibular glandular kallikrein-9 OS=Rattus norvegicus GN=Klk9 PE=1 SV=1	8.11778e+07	1.48509e+06	1.23185e+06	1.07524e+07	960105	1.86281e+06
KNT1_RAT	11	1102.08	T-kininogen 1 OS=Rattus norvegicus GN=Map1 PE=1 SV=2	1.26965e+06	550570	257627	142409	1.07755e+06	207821
KNT2_RAT	10	993.99	T-kininogen 2 OS=Rattus norvegicus PE=1 SV=2	133621	58463.1	27176.8	43096.3	265633	86351.8
KVX01_RAT	3	357.01	Ig kappa chain V region S211 OS=Rattus norvegicus PE=1 SV=1	3.07222e+07	1.89806e+07	3.41859e+06	1.86569e+07	1.14896e+07	4.68361e+06
LAC2_RAT	8	893.27	Ig lambda-2 chain C region OS=Rattus norvegicus PE=2 SV=1	4.58712e+08	1.28594e+08	2.77275e+07	2.66068e+08	6.16713e+07	3.51976e+07
LDHB_RAT	3	253.89	L-lactate dehydrogenase B chain OS=Rattus norvegicus GN=Ldhb PE=1 SV=2	400480	477066	29712.7	3.71725e+06	53358.6	49882.3
LG3BP_RAT	8	678.53	Galectin-3-binding protein OS=Rattus norvegicus GN=Lgals3bp PE=1 SV=2	9.50506e+06	1.14197e+06	533564	1.68679e+06	2.58224e+06	197181
LHPP_RAT	3	465.27	Phospholysine phosphohistidine inorganic pyrophosphate phosphatase OS=Rattus norvegicus GN=Lhpp PE=2 SV=1	1.47316e+06	194138	114241	2.30131e+06	223416	345857
LRP2_RAT	55	5014.95	Low-density lipoprotein receptor-related protein 2 OS=Rattus norvegicus GN=Lrp2 PE=1 SV=1	9.8216e+07	3.93879e+07	1.07139e+07	6.31756e+07	4.83361e+07	3.55213e+06
LYAG_RAT	12	1073.44	Lysosomal alpha-glucosidase OS=Rattus norvegicus GN=Gaa PE=2 SV=1	1.09052e+07	4.26515e+06	631324	1.56551e+07	5.91185e+06	960944
LYPA1_RAT	2	105.66	Acyl-protein thioesterase 1 OS=Rattus norvegicus GN=Lypla1 PE=1 SV=1	75234.5	93456.7	2081.59	2.10258e+06	1.34749e+06	136958
MDHC_RAT	3	305.67	Malate dehydrogenase, cytoplasmic OS=Rattus norvegicus GN=Mdh1 PE=1 SV=3	1.9003e+06	987928	187613	7.54369e+06	819102	196730
MEP1A_RAT	15	1794.84	Meprin A subunit alpha OS=Rattus norvegicus GN=Mep1a PE=1 SV=2	1.21679e+08	2.97513e+07	8.51608e+06	3.65303e+07	4.10678e+08	4.60345e+06
MEP1B_RAT	10	941.58	Meprin A subunit beta OS=Rattus norvegicus GN=Mep1b PE=1 SV=3	1.31544e+07	1.64893e+07	1.39973e+06	1.03239e+07	4.67763e+08	311495
MTND_RAT	2	228.48	1,2-dihydroxy-3-keto-5-methylthiopentene dioxygenase OS=Rattus norvegicus GN=Adi1 PE=2 SV=1	756094	43674.7	32476.9	1.4809e+06	285915	190058
MUG1_RAT	14	952.03	Murinoglobulin-1 OS=Rattus norvegicus GN=Mug1 PE=2 SV=1	2.35718e+06	2.65539e+06	573235	437834	1.91541e+06	447049
MUP_RAT	32	3005.92	Major urinary protein OS=Rattus norvegicus PE=1 SV=1	3.51311e+08	2.89844e+08	3.07238e+07	5.17024e+08	1.21397e+08	1.35705e+08
MUP_RATRT	10	987.88	Major urinary protein (Fragments) OS=Rattus rattus PE=1 SV=2	109984	49411	12654.5	496697	544641	768563
MXRA8_RAT	9	670.43	Matrix-remodeling-associated protein 8 OS=Rattus norvegicus GN=Mxra8 PE=2 SV=1	9.32371e+06	8.76637e+06	7.24793e+06	1e+06	1.64193e+06	2.6215e+06
MYG_RAT	9	1188.45	Myoglobin OS=Rattus norvegicus GN=Mb PE=1 SV=3	1.87182e+06	101112	86439.7	9.41974e+07	5.36756e+07	6.85515e+06
NAGAB_RAT	2	222.15	Alpha-N-acetylgalactosaminidase OS=Rattus norvegicus GN=Naga PE=2 SV=1	2.10349e+06	935121	165079	3.12357e+06	2.18063e+06	334591
NEP_RAT	9	691.2	Neprilysin OS=Rattus norvegicus GN=Mme PE=1 SV=2	1.08556e+07	1.55421e+06	354459	2.39303e+06	2.68202e+06	232786
NHRF1_RAT	4	133.45	Na(+)/H(+) exchange regulatory cofactor NHE-RF1 OS=Rattus norvegicus GN=Slc9a3r1 PE=1 SV=3	493967	1.46931e+06	134926	145325	3.30968e+06	2620.36
NHRF3_RAT	3	197.1	Na(+)/H(+) exchange regulatory cofactor NHE-RF3 OS=Rattus norvegicus GN=Pdzk1 PE=1 SV=2	2.79811e+06	1.89677e+06	1.38892e+06	932702	846189	437970
NID1_RAT	5	326.3	Nidogen-1 (Fragment) OS=Rattus norvegicus GN=Nid1 PE=2 SV=2	1.36586e+06	2.8397e+06	1.95997e+06	340204	1.12169e+06	475305
NPTN_RAT	3	352.47	Neuroplastin OS=Rattus norvegicus GN=Nptn PE=1 SV=2	9.69465e+06	3.49416e+06	1.70142e+06	2.57864e+06	1.48671e+06	1.20248e+06
NTF2_RAT	5	434.55	Nuclear transport factor 2 OS=Rattus norvegicus GN=Nutf2 PE=1 SV=1	1.08553e+06	1.98884e+06	640415	3.39744e+06	6.16714e+06	4.1627e+06
NUCB1_RAT	5	224.7	Nucleobindin-1 OS=Rattus norvegicus GN=Nucb1 PE=1 SV=1	2.36171e+06	1.10118e+06	2.57982e+06	141639	101799	697247
OSTP_RAT	4	264.51	Osteopontin OS=Rattus norvegicus GN=Spp1 PE=1 SV=2	5.36286e+06	4.33818e+06	4.03464e+06	321272	6859.5	4.13828e+06
PARK7_RAT	4	491.9	Protein DJ-1 OS=Rattus norvegicus GN=Park7 PE=1 SV=1	1.51707e+06	91363.3	176105	4.4149e+07	1.94783e+06	3.34608e+06
PBAS_RAT	6	802.25	Probasin OS=Rattus norvegicus GN=Pbsn PE=1 SV=1	2.21583e+06	5.77394e+06	149815	7.49184e+07	1.53448e+08	2.03199e+06
PEBP1_RAT	8	891.43	Phosphatidylethanolamine-binding protein 1 OS=Rattus norvegicus GN=Pebp1 PE=1 SV=3	5.6143e+06	1.66856e+06	269684	2.52997e+07	421744	228518
PGAM1_RAT	2	120.42	Phosphoglycerate mutase 1 OS=Rattus norvegicus GN=Pgam1 PE=1 SV=4	385220	392111	64689	1.20372e+06	164877	61587.7
PGAM2_RAT	3	235.61	Phosphoglycerate mutase 2 OS=Rattus norvegicus GN=Pgam2 PE=2 SV=2	41397.8	13244.3	3062.34	3.3087e+06	220889	140242
PIGR_RAT	9	878.45	Polymeric immunoglobulin receptor OS=Rattus norvegicus GN=Pigr PE=2 SV=1	4.97137e+07	4.14417e+07	5.13347e+07	1.35174e+07	2.03869e+07	2.37312e+07
PLBL2_RAT	2	154.67	Putative phospholipase B-like 2 OS=Rattus norvegicus GN=Plbd2 PE=1 SV=2	1.16232e+06	118646	84821.8	907409	129416	105422
PLMN_RAT	24	2426.02	Plasminogen OS=Rattus norvegicus GN=Plg PE=2 SV=2	1.17725e+08	9.28457e+07	1.90093e+07	6.00591e+07	3.64253e+07	3.20791e+07
PPAL_RAT	6	455.01	Lysosomal acid phosphatase OS=Rattus norvegicus GN=Acp2 PE=1 SV=1	5.37487e+06	1.95174e+06	749974	1.09054e+07	4.13348e+06	822528
PPIA_RAT	3	135.65	Peptidyl-prolyl cis-trans isomerase A OS=Rattus norvegicus GN=Ppia PE=1 SV=2	1.01675e+06	439878	92478.6	1.27153e+06	451805	35861.5
PRDX5_RAT	4	207.38	Peroxiredoxin-5, mitochondrial OS=Rattus norvegicus GN=Prdx5 PE=1 SV=1	573395	44436.7	914.013	5.14438e+06	633520	342005
PRVA_RAT	9	1016.18	Parvalbumin alpha OS=Rattus norvegicus GN=Pvalb PE=1 SV=2	6.16114e+06	1.00706e+07	5.59182e+06	3.61908e+07	5.02648e+07	6.97284e+07
PTGDS_RAT	4	379.51	Prostaglandin-H2 D-isomerase OS=Rattus norvegicus GN=Ptgds PE=1 SV=2	1.49405e+07	2.28849e+06	933187	2.67035e+06	434333	1.72808e+06
QSOX1_RAT	4	193.9	Sulfhydryl oxidase 1 OS=Rattus norvegicus GN=Qsox1 PE=1 SV=1	2.28395e+06	517998	253033	513943	219153	205936
REG3G_RAT	11	1395.27	Regenerating islet-derived protein 3-gamma OS=Rattus norvegicus GN=Reg3g PE=1 SV=1	2.93585e+08	8.12361e+07	1.3138e+07	6.81491e+08	8.15734e+07	1.45084e+08
RET1_RAT	3	260.61	Retinol-binding protein 1 OS=Rattus norvegicus GN=Rbp1 PE=1 SV=2	861467	98846.6	11009.8	2.72905e+06	719862	102766
RISC_RAT	6	772.96	Retinoid-inducible serine carboxypeptidase OS=Rattus norvegicus GN=Scpep1 PE=2 SV=1	1.09325e+06	1.76539e+06	1.36123e+06	4.54079e+06	7.46272e+06	6.4011e+06
ROB1_RAT	3	337.35	Protein RoBo-1 OS=Rattus norvegicus PE=1 SV=1	1.16681e+06	809411	382178	1.28126e+06	757957	357154
SAMP_RAT	9	685.93	Serum amyloid P-component OS=Rattus norvegicus GN=Apcs PE=2 SV=2	3.48412e+07	7.23237e+06	3.33861e+06	6.07364e+06	3.52231e+06	4.24978e+06
SAP_RAT	5	690.27	Sulfated glycoprotein 1 OS=Rattus norvegicus GN=Psap PE=1 SV=1	5.69994e+07	6.47504e+06	841851	3.85787e+07	1.41223e+07	2.33105e+06
SG2A2_RAT	6	689.1	Secretoglobin family 2A member 2 OS=Rattus norvegicus GN=Scgb2a2 PE=1 SV=1	1.17859e+08	2.59669e+07	8.58622e+06	7.43913e+06	1.59123e+07	1.17644e+07
SIAE_RAT	5	582.25	Sialate O-acetylesterase OS=Rattus norvegicus GN=Siae PE=1 SV=2	3.54462e+06	1.53554e+06	6.34051e+06	1.76852e+07	1.45091e+07	1.54454e+07
SLC31_RAT	13	1326.55	Neutral and basic amino acid transport protein rBAT OS=Rattus norvegicus GN=Slc3a1 PE=1 SV=1	2.77678e+07	8.10997e+06	1.83212e+06	1.20867e+07	1.13114e+07	1.09082e+06
SODC_RAT	12	1217.57	Superoxide dismutase [Cu-Zn] OS=Rattus norvegicus GN=Sod1 PE=1 SV=2	7.84793e+07	2.66917e+07	3.76022e+07	2.04952e+08	1.30278e+08	1.14836e+08
SODE_RAT	5	382.71	Extracellular superoxide dismutase [Cu-Zn] OS=Rattus norvegicus GN=Sod3 PE=1 SV=2	7.9179e+06	2.19654e+06	555965	3.24319e+06	1.51907e+06	285263
SPA3K_RAT	23	2311.14	Serine protease inhibitor A3K OS=Rattus norvegicus GN=Serpina3k PE=1 SV=3	6.84848e+08	2.75175e+08	2.85621e+07	1.7733e+08	7.09369e+07	2.75529e+07
SPA3L_RAT	25	2890.93	Serine protease inhibitor A3L OS=Rattus norvegicus GN=Serpina3l PE=1 SV=3	4.934e+08	3.0197e+08	4.41259e+07	1.30115e+08	9.86699e+07	3.32147e+07
SPA3N_RAT	4	360.78	Serine protease inhibitor A3N OS=Rattus norvegicus GN=Serpina3n PE=1 SV=3	8.10225e+06	783187	1.13174e+06	1.97575e+06	367422	454200
SPBP_RAT	6	710.35	Prostatic spermine-binding protein OS=Rattus norvegicus GN=Sbp PE=1 SV=1	6.41004e+07	821756	244523	9.3643e+06	578890	1.87139e+06
TGM4_RAT	14	1205.34	Protein-glutamine gamma-glutamyltransferase 4 OS=Rattus norvegicus GN=Tgm4 PE=1 SV=2	2.31158e+06	1.28087e+06	84660.3	2.30201e+07	3.96317e+07	2.45462e+06
THIO_RAT	2	109.99	Thioredoxin OS=Rattus norvegicus GN=Txn PE=1 SV=2	2.04592e+06	248490	92556.2	2.02078e+06	377192	229541
THRB_RAT	3	278.52	Prothrombin OS=Rattus norvegicus GN=F2 PE=1 SV=1	5.69922e+07	2.3125e+07	1.07919e+07	3.96821e+07	2.18689e+07	1.11524e+07
THTM_RAT	2	187.58	3-mercaptopyruvate sulfurtransferase OS=Rattus norvegicus GN=Mpst PE=1 SV=3	2.14753e+06	4795.66	6847.02	2.44044e+06	42840.6	332773
TPIS_RAT	5	554.96	Triosephosphate isomerase OS=Rattus norvegicus GN=Tpi1 PE=1 SV=2	2.00474e+06	296331	23388.2	7.35727e+06	110993	66855.5
TPP1_RAT	2	128.67	Tripeptidyl-peptidase 1 OS=Rattus norvegicus GN=Tpp1 PE=1 SV=1	312963	36551.2	21652.5	386986	422759	86379.6
TRFE_RAT	42	3879.41	Serotransferrin OS=Rattus norvegicus GN=Tf PE=1 SV=3	2.17801e+08	4.02221e+07	4.29531e+07	3.77612e+08	1.08059e+08	7.65685e+07
UP1_RAT	3	516.47	Urinary protein 1 OS=Rattus norvegicus PE=1 SV=1	2.72039e+08	1.17921e+09	1.96947e+08	9.29215e+07	4.63758e+08	1.67081e+08
UP2_RAT	3	700.06	Urinary protein 2 OS=Rattus norvegicus PE=1 SV=1	7.12466e+08	1.979e+09	5.5822e+08	6.19183e+08	1.92005e+09	3.64515e+08
UP3_RAT	2	353.65	Urinary protein 3 OS=Rattus norvegicus PE=2 SV=1	1.61404e+08	2.14714e+08	1.68473e+08	7.33653e+07	6.5065e+07	7.83854e+07
UROK_RAT	7	600.47	Urokinase-type plasminogen activator OS=Rattus norvegicus GN=Plau PE=1 SV=1	3.34161e+07	1.54271e+07	2.98613e+06	3.55939e+06	2.13055e+06	3.66781e+06
UROM_RAT	18	1703.76	Uromodulin OS=Rattus norvegicus GN=Umod PE=2 SV=1	4.36275e+06	1.40419e+06	3.66461e+06	1.48333e+07	1.12335e+07	1.20932e+07
VTDB_RAT	11	1182.26	Vitamin D-binding protein OS=Rattus norvegicus GN=Gc PE=1 SV=3	2.5865e+07	2.20913e+06	3.73221e+06	4.52096e+07	932391	2.10113e+06
WFDC2_RAT	4	586.83	WAP four-disulfide core domain protein 2 OS=Rattus norvegicus GN=Wfdc2 PE=2 SV=1	6.02446e+06	5.71752e+06	2.10448e+06	1.07953e+06	4.36442e+06	1.74882e+06
ZA2G_RAT	5	307.08	Zinc-alpha-2-glycoprotein OS=Rattus norvegicus GN=Azgp1 PE=2 SV=1	309501	10690.5	23719.2	4.2348e+06	332401	249583
